# Supplementary material for: Medium bandgap copolymers based on carbazole and quinoxaline exceeding 1.0 V open-circuit voltages
Source: Royal Society of Chemistry journal article supplement (doi:10.1039/c5ra25088a), 2016-01-01
Supplement: c5ra25088a1.pdf [file c5ra25088a1.pdf]

## Electronic Supplementary Information (ESI)

### Medium Bandgap Copolymers Based on Carbazole and Quinoxaline Exceeding 1.0 V Open-Circuit Voltages

*Kyu Cheol Lee<sup>a,§</sup>, Taehyo Kim<sup>a,§</sup>, Seyeong Song<sup>a</sup>, Yiho Kim<sup>a</sup>, Gitish. K. Dutta<sup>b</sup>, Dong Suk Kim<sup>c\*</sup>, Jin Young Kim<sup>a\*</sup> and Changduk Yang<sup>a\*</sup>*

<sup>a</sup>Department of Energy Engineering, School of Energy and Chemical Engineering, Ulsan National Institute of Science and Technology (UNIST) Ulsan 689-798, South Korea

<sup>b</sup>Department of Chemistry, National Institute of Technology Meghalaya Bijini Complex, Laitumkhrach, Shillong, 793003 Meghalaya, India

<sup>c</sup>KIER-UNIST Advanced Center for Energy, Korea Institute of Energy Research, Ulsan 689-798, South Korea

E-mail: kimds@kier.re.kr; jykim@unist.ac.kr; yang@unist.ac.kr

Keywords: carbazole, charge recombination, fluorine, open-circuit voltage, quinoxaline

| Table of Contents                                                                | Page number |
|----------------------------------------------------------------------------------|-------------|
| TGA for a series of the of the Cz- Qx-based coolymers                            | S2          |
| GIWAXS line cut images of the optimized BHJ PSCs                                 | S3          |
| Photovoltaic characteristics of the annealed PSCs with various additives         | S4          |
| Summary of photovoltaic characteristics the annealed PSCs with various additives | S5          |

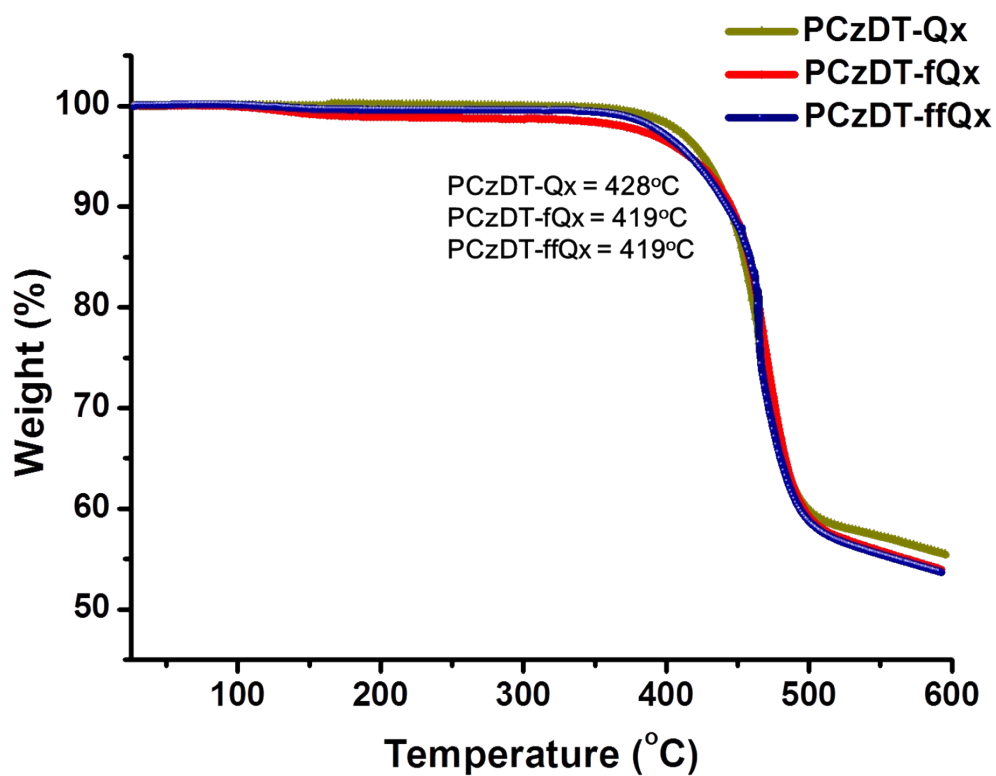

**Fig. S1** TGA for a series of the of the Cz- Qx-based coolymers

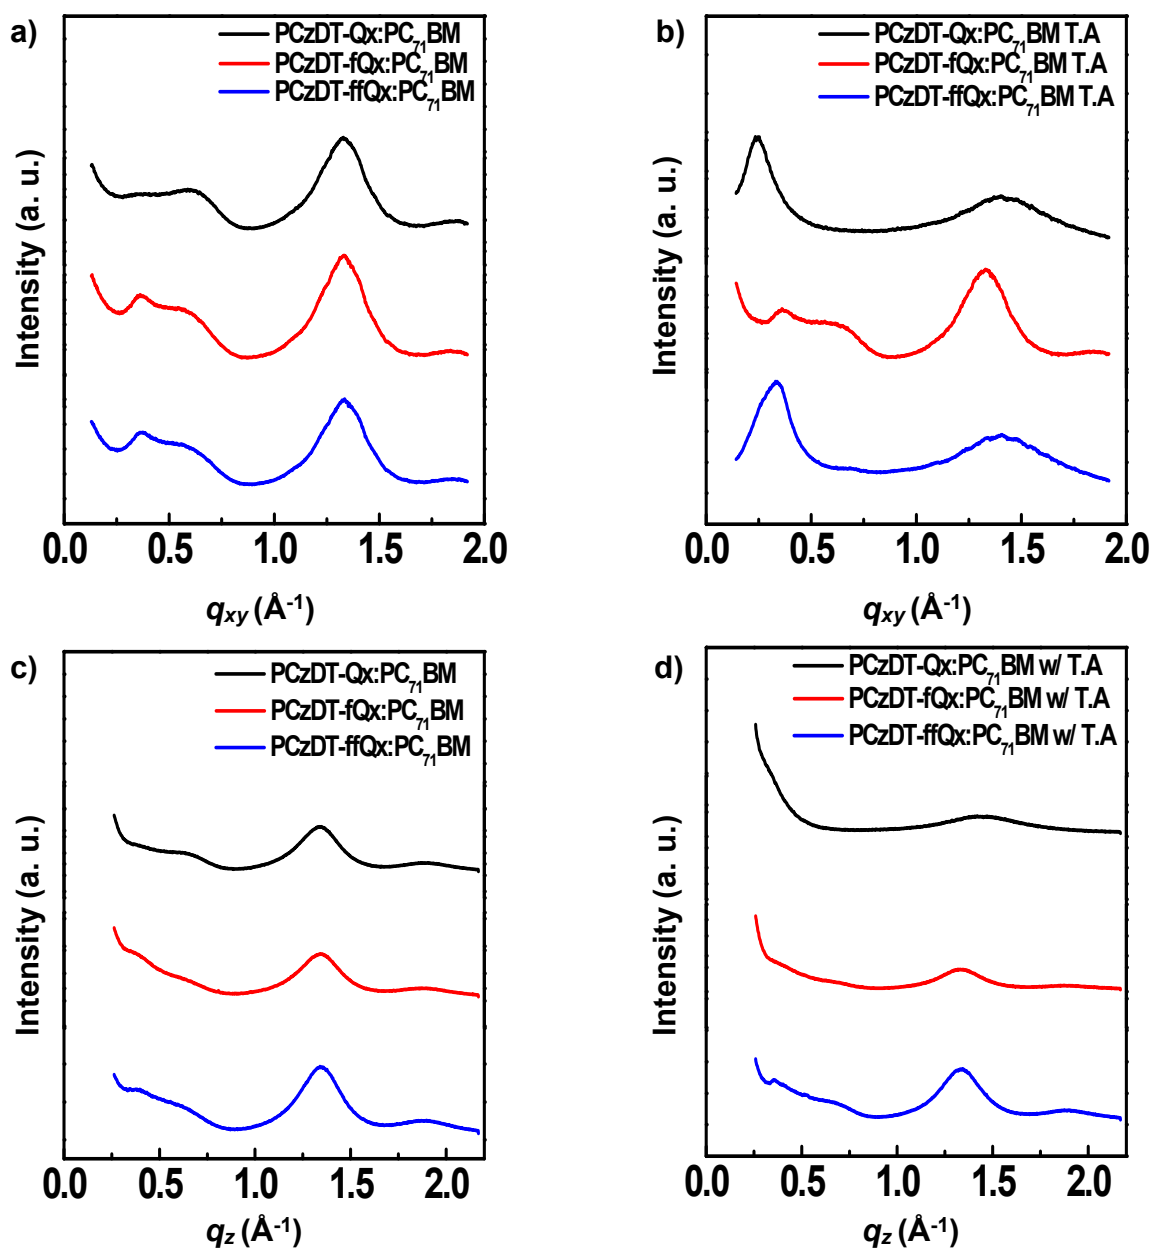

**Fig. S2** GIWAXS line cut images of the optimized BHJ PSCs; (a-b) in-plane line cuts and (c-d) out-of-plane line cuts.

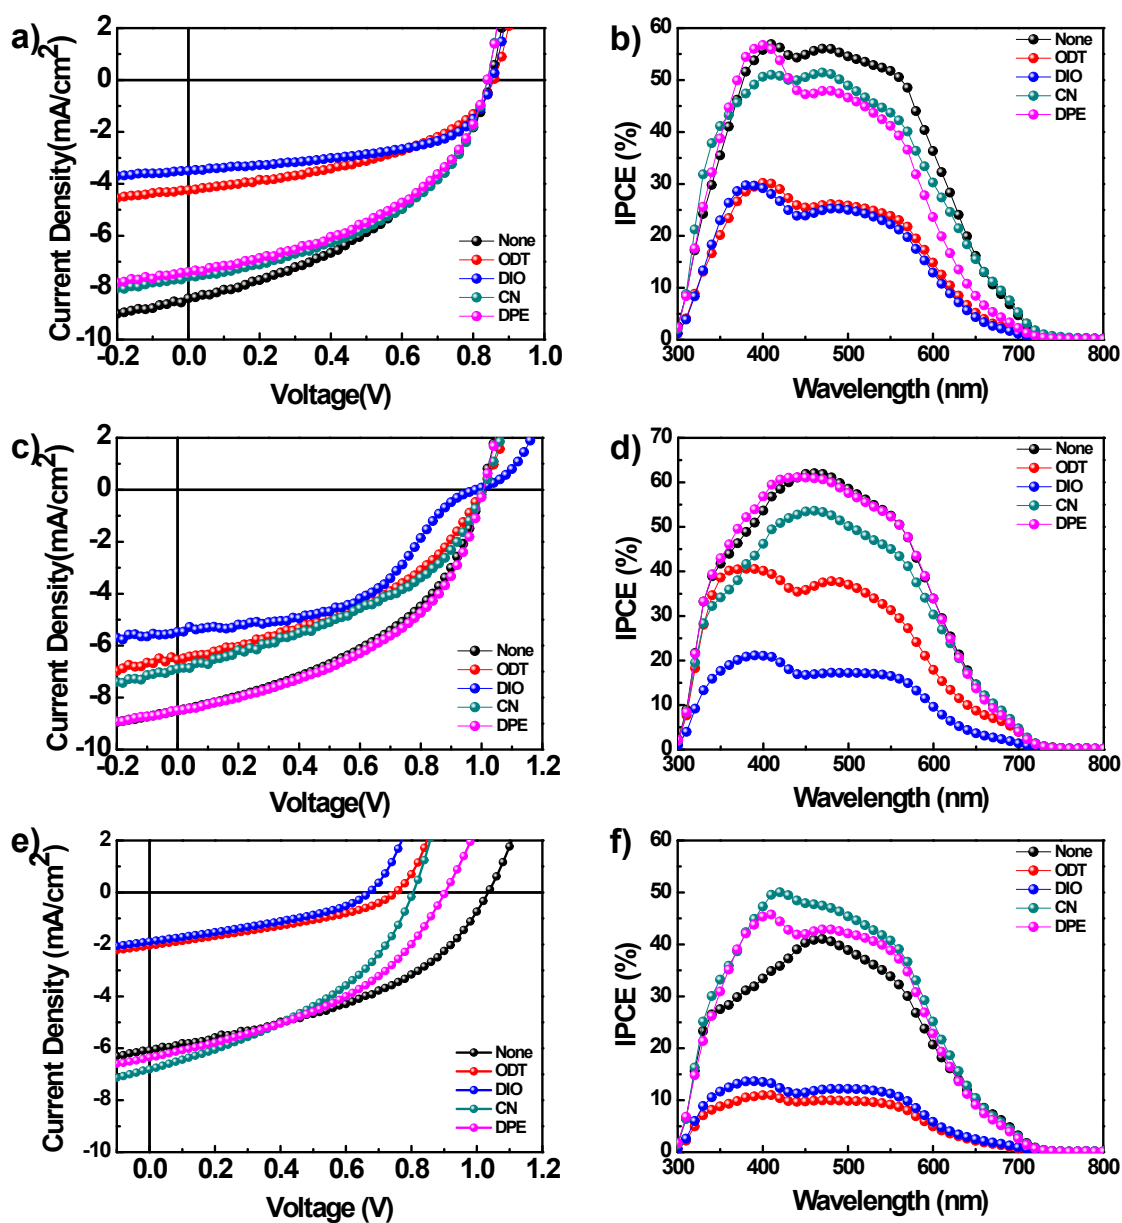

**Fig. S3** Photovoltaic characteristics of the annealed PSCs with various additives. (a, c, e) Current density versus voltage ( $J$ - $V$ ) characteristics and (b, d, f) the corresponding incident photon-to-current efficiency (IPCE) for (a,b) PCzDT-Q<sub>x</sub>, (b,c) PCzDT-fQ<sub>x</sub>, (e,f) PCzDT-ffQ<sub>x</sub>, respectively.

**Table S1** Summary of photovoltaic characteristics the annealed PSCs with various additives.

| Polymer <sup>a</sup> | Polymer:PC <sub>71</sub> BM ratio | additive <sup>b</sup> | $J_{sc}$ (mA/cm <sup>2</sup> ) | $V_{oc}$ (V) | $FF$ | PCE (%) |
|----------------------|-----------------------------------|-----------------------|--------------------------------|--------------|------|---------|
| <b>PCzDT-Qx</b>      | 1:3                               | X                     | 8.42                           | 0.85         | 0.42 | 3.24    |
|                      |                                   | ODT                   | 4.24                           | 0.86         | 0.45 | 1.77    |
|                      |                                   | DIO                   | 3.50                           | 0.85         | 0.55 | 1.78    |
|                      |                                   | CN                    | 7.58                           | 0.84         | 0.47 | 3.23    |
|                      |                                   | DPE                   | 7.39                           | 0.84         | 0.46 | 3.08    |
| <b>PCzDT-fQx</b>     | 1:2.5                             | X                     | 8.51                           | 1.00         | 0.45 | 3.80    |
|                      |                                   | ODT                   | 5.47                           | 0.98         | 0.47 | 2.54    |
|                      |                                   | DIO                   | 6.54                           | 1.00         | 0.42 | 2.76    |
|                      |                                   | CN                    | 6.89                           | 1.00         | 0.42 | 2.88    |
|                      |                                   | DPE                   | 8.63                           | 0.96         | 0.49 | 4.03    |
| <b>PCzDT-ffQx</b>    | 1:2                               | X                     | 6.08                           | 1.04         | 0.42 | 2.67    |
|                      |                                   | ODT                   | 2.51                           | 0.81         | 0.39 | 0.79    |
|                      |                                   | DIO                   | 1.93                           | 0.70         | 0.35 | 0.47    |
|                      |                                   | CN                    | 6.81                           | 0.81         | 0.40 | 2.21    |
|                      |                                   | DPE                   | 6.35                           | 0.90         | 0.42 | 2.40    |

<sup>a</sup>Thermal annealing at 110 °C, 10min. <sup>b</sup>2%, v/v
